# Supplementary material for: Never Fold to Fold Continuously: A Conundrum in Ubiquitin–Proteasome System (UPS)-Mediated Protein Quality Control (PQC)
Source: MDPI journal article supplement (doi:10.3390/biophysica4020011), 2024-03-30
Supplement: s1 [file s1]

**Table S1.**

| <b>Enzymes</b> | <b>Number of Members</b> | <b>% of disordered regions</b> |
|----------------|--------------------------|--------------------------------|
| E1             | 2                        | ~ 6                            |
| E2             | 29                       | ~ 18                           |
| E3             | 563                      | ~ 20                           |
